# Supplementary material for: Three New Compounds, Licopyranol A–C, Together with Eighteen Known Compounds Isolated from Glycyrrhiza glabra L. and Their Antitumor Activities
Source: MDPI journal article supplement (doi:10.3390/metabo12100896), 2022-09-23
Supplement: s1 [file s1]

# Supplementary materials

## List of Contents

**Figure S1.** The inhibitory effects of the extracts of *Glycyrrhiza glabra* on RKO and HT-29 cells treated with 10, 20, 40, and 80 µg/ml for 48 h.

**Figure S2** UV spectrum of compound 1

**Figure S3** HR-ESI-MS spectrum of compound 1

**Figure S4** <sup>1</sup>H NMR spectrum of compound 1 in DMSO-*d*<sub>6</sub> (400 MHz)

**Figure S5** <sup>13</sup>C NMR spectrum of compound 1 in DMSO-*d*<sub>6</sub> (100 MHz)

**Figure S6** DEPT 135 spectrum of compound 1 in DMSO-*d*<sub>6</sub>

**Figure S7** HSQC spectrum of compound 1 in DMSO-*d*<sub>6</sub>

**Figure S8** HMBC spectrum of compound 1 in DMSO-*d*<sub>6</sub>

**Figure S9** <sup>1</sup>H-<sup>1</sup>H COSY spectrum of compound 1 in DMSO-*d*<sub>6</sub>

**Figure S10** UV spectrum of compound 2

**Figure S11** HR-ESI-MS spectrum of compound 2

**Figure S12** <sup>1</sup>H NMR spectrum of compound 2 in DMSO-*d*<sub>6</sub> (400 MHz)

**Figure S13** <sup>13</sup>C NMR spectrum of compound 2 in DMSO-*d*<sub>6</sub> (100 MHz)

**Figure S14** DEPT 135 spectrum of compound 2 in DMSO-*d*<sub>6</sub>

**Figure S15** HSQC spectrum of compound 2 in DMSO-*d*<sub>6</sub>

**Figure S16** HMBC spectrum of compound 2 in DMSO-*d*<sub>6</sub>

**Figure S17** <sup>1</sup>H-<sup>1</sup>H COSY spectrum of compound 2 in DMSO-*d*<sub>6</sub>

**Figure S18** UV spectrum of compound 3

**Figure S19** HR-ESI-MS spectrum of compound 3

**Figure S20** <sup>1</sup>H NMR spectrum of compound 3 in DMSO-*d*<sub>6</sub> (400 MHz)

**Figure S21** <sup>13</sup>C NMR spectrum of compound 3 in DMSO-*d*<sub>6</sub> (100 MHz)

**Figure S22** DEPT 135 spectrum of compound 3 in DMSO-*d*<sub>6</sub>

**Figure S23** HSQC spectrum of compound 3 in DMSO-*d*<sub>6</sub>

**Figure S24** HMBC spectrum of compound 3 in DMSO-*d*<sub>6</sub>

**Figure S25** <sup>1</sup>H-<sup>1</sup>H COSY spectrum of compound 3 in DMSO-*d*<sub>6</sub>

**Table S1** R<sub>f</sub> value and UV lambda Max of Compounds 4-21

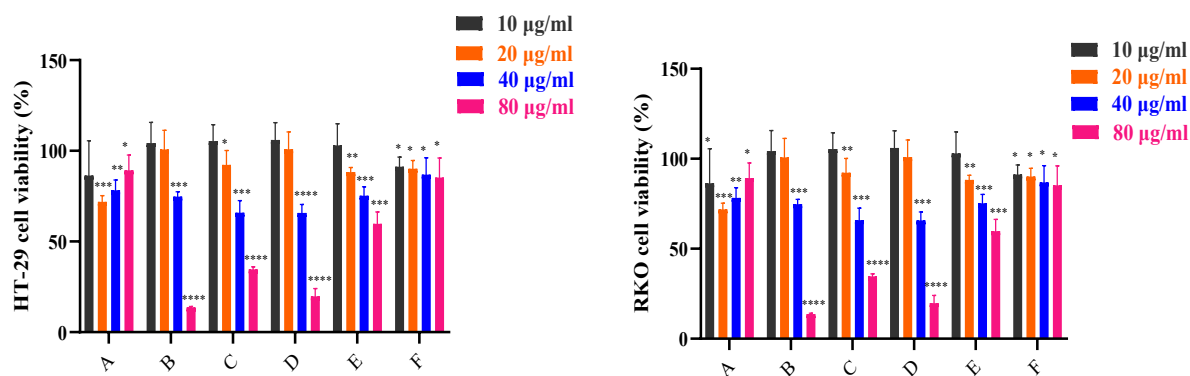

**Figure S1:** The effects of the extracts of *Glycyrrhiza glabra* on RKO and HT-29 cells treated with 10, 20, 40 and 80 µg/ml for 48 h; \* $P < 0.05$ , \*\* $P < 0.01$ , \*\*\* $P < 0.001$ , \*\*\*\* $P < 0.0001$ , compared with corresponding control groups (A: 70% MeOH extract of *G. glabra*, B: Petroleum ether extract, C: Dichloromethane extract, D: Ethyl acetate extract, E: *n*-butanol extract, F: Water extract)

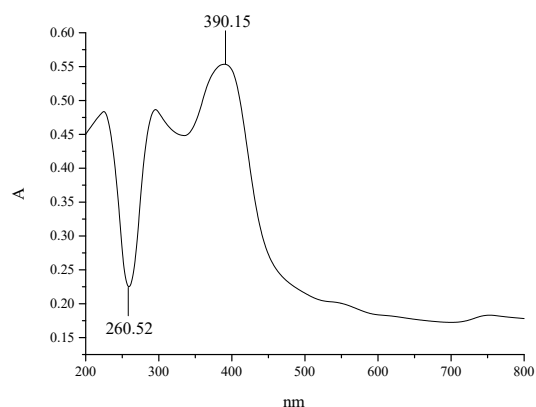

**Figure S2.** UV spectrum of compound 1

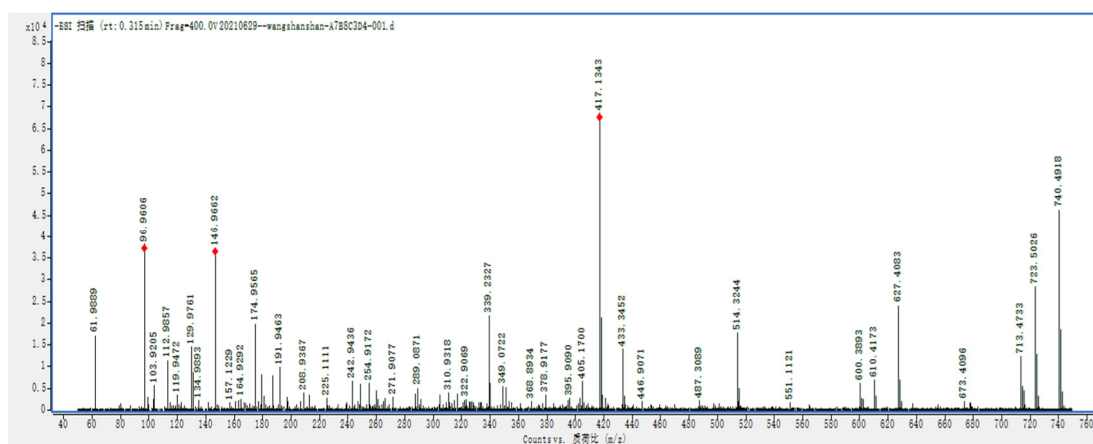

**Figure S3.** HR-ESI-MS spectrum of compound 1

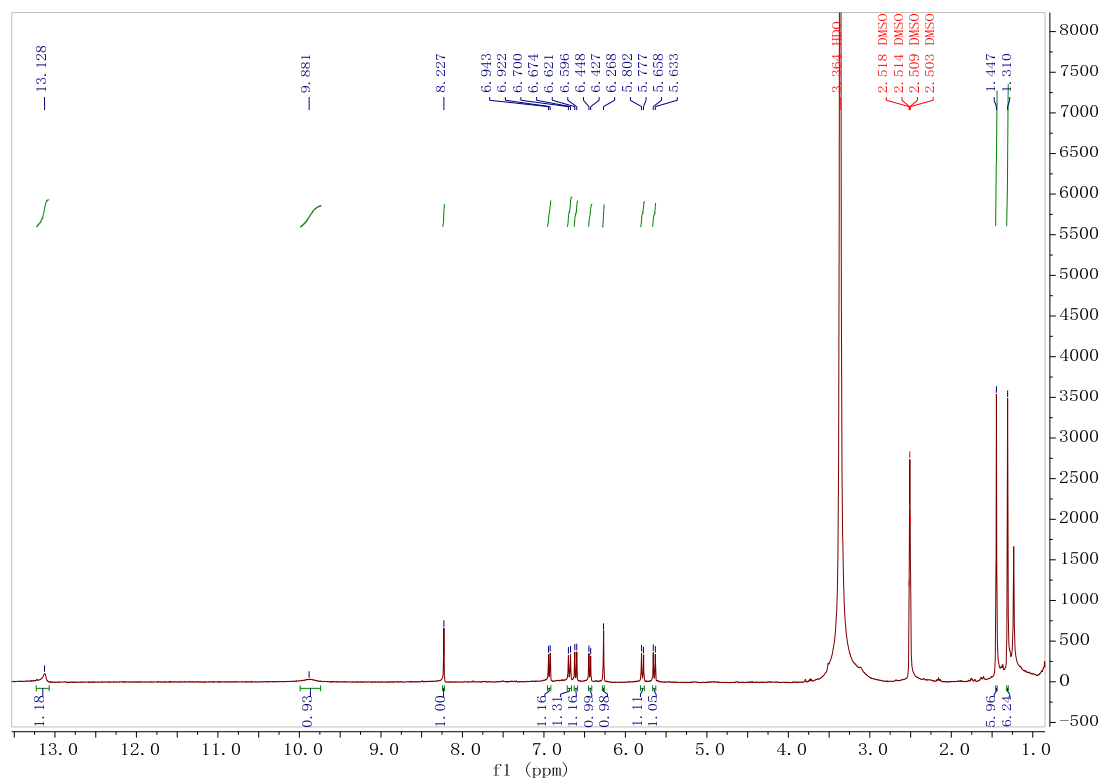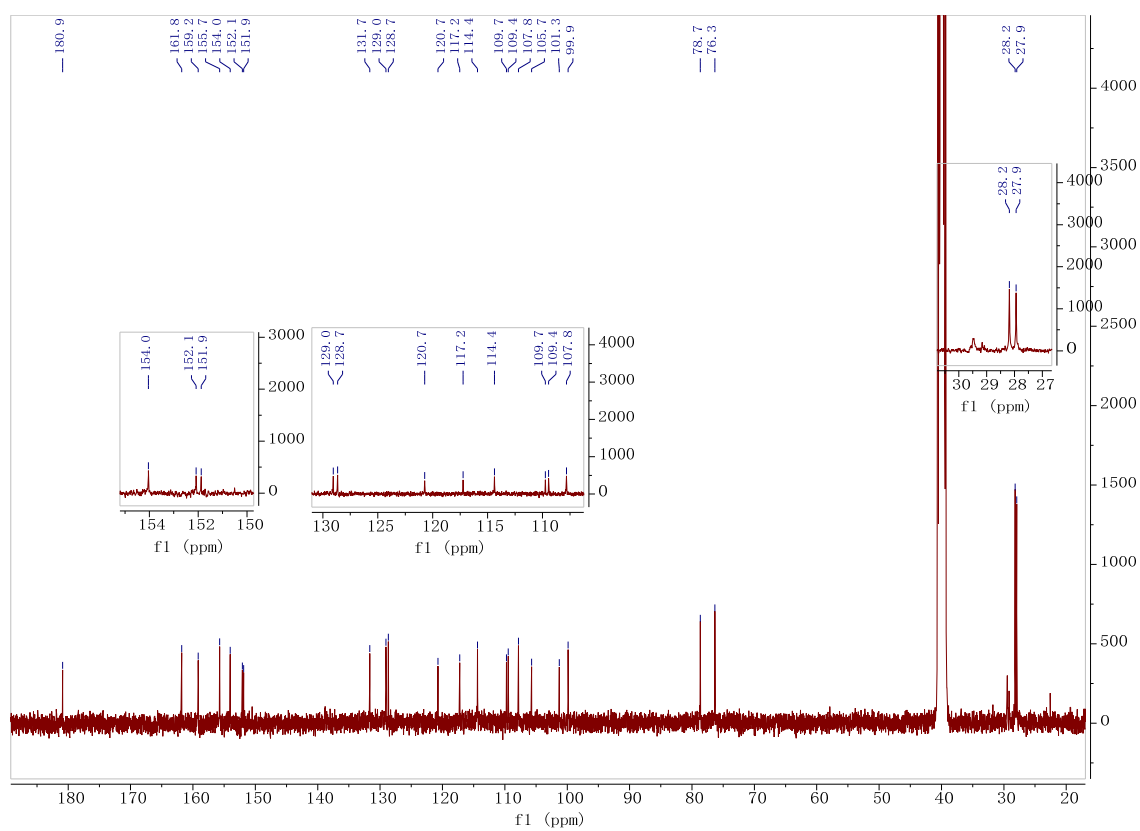

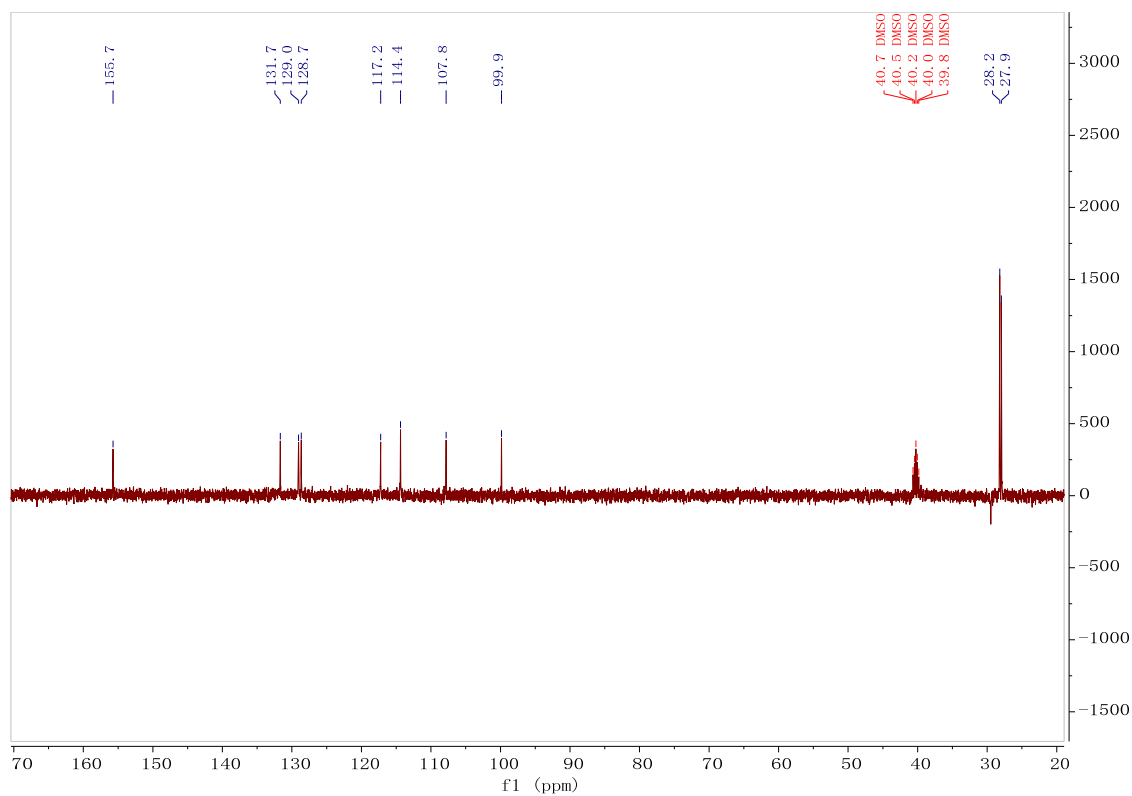

**Figure S6.** DEPT 135 spectrum of compound **1** in DMSO-*d*<sub>6</sub>

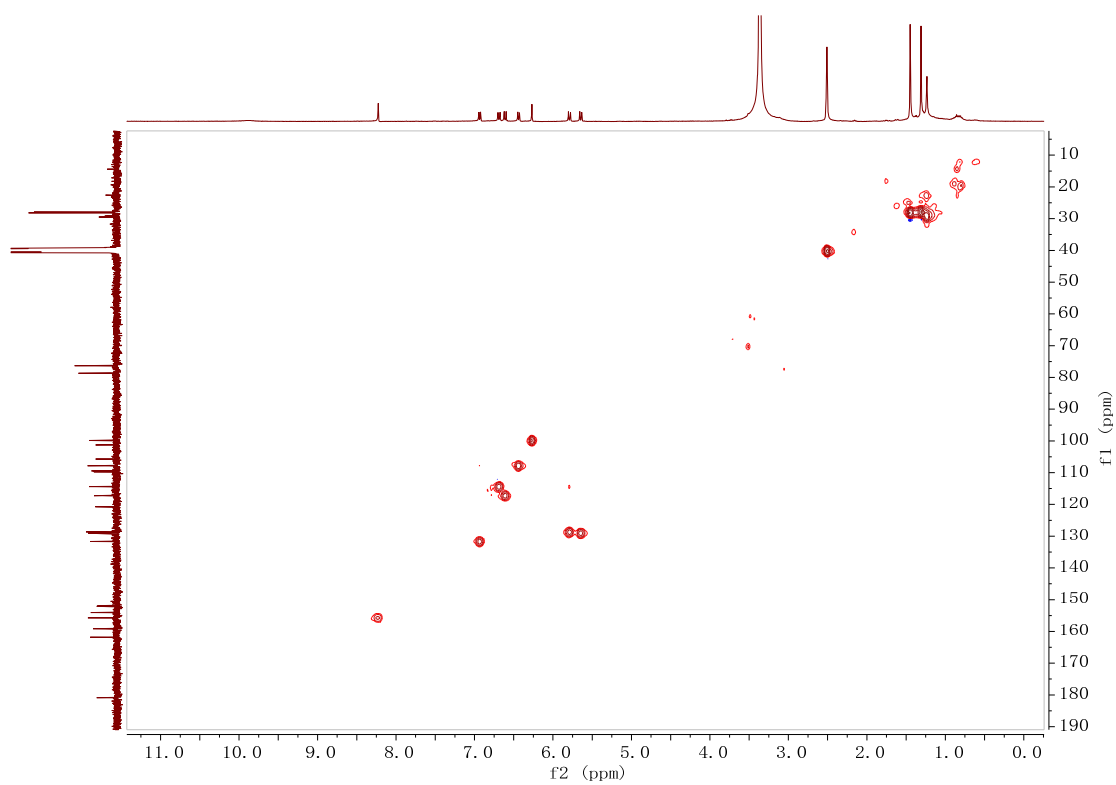

**Figure S7.** HSQC spectrum of compound **1** in DMSO-*d*<sub>6</sub>

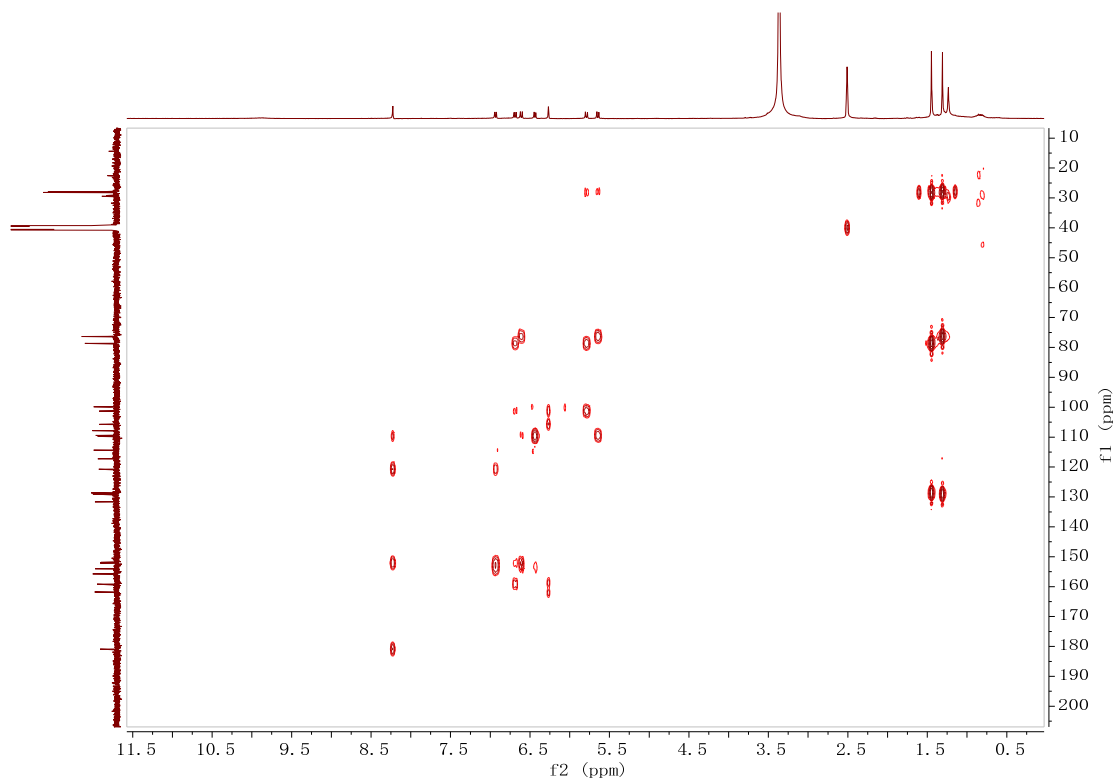

**Figure S8.** HMBC spectrum of compound **1** in DMSO-*d*<sub>6</sub>

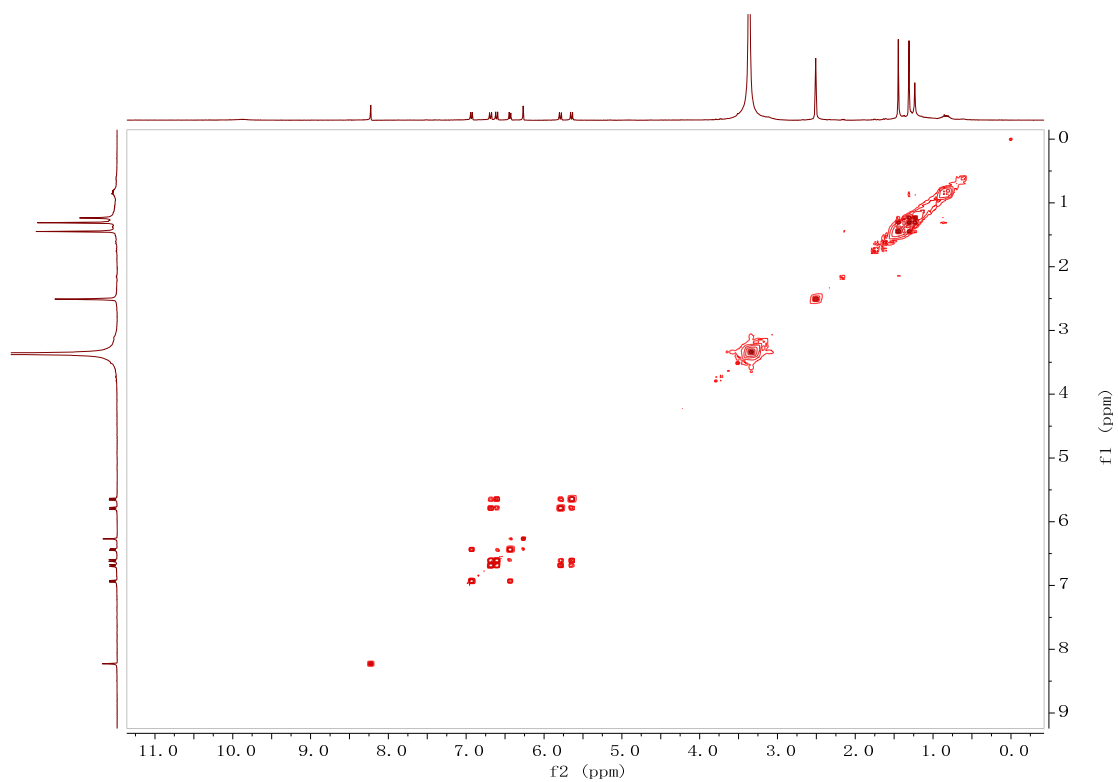

**Figure S9.** <sup>1</sup>H-<sup>1</sup>H COSY spectrum of compound **1** in DMSO-*d*<sub>6</sub>



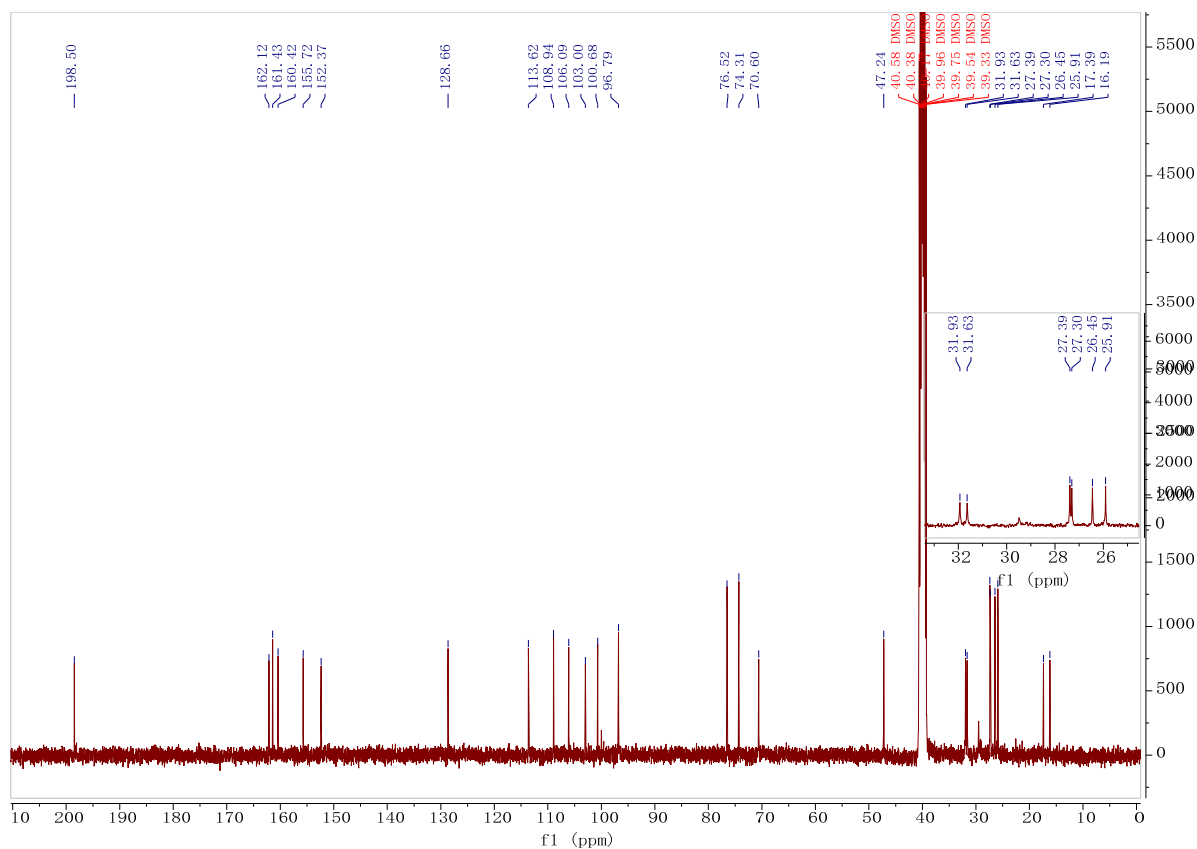

**Figure S13.  $^{13}\text{C}$  NMR spectrum of compound 2 in DMSO- $d_6$  (100 MHz)**

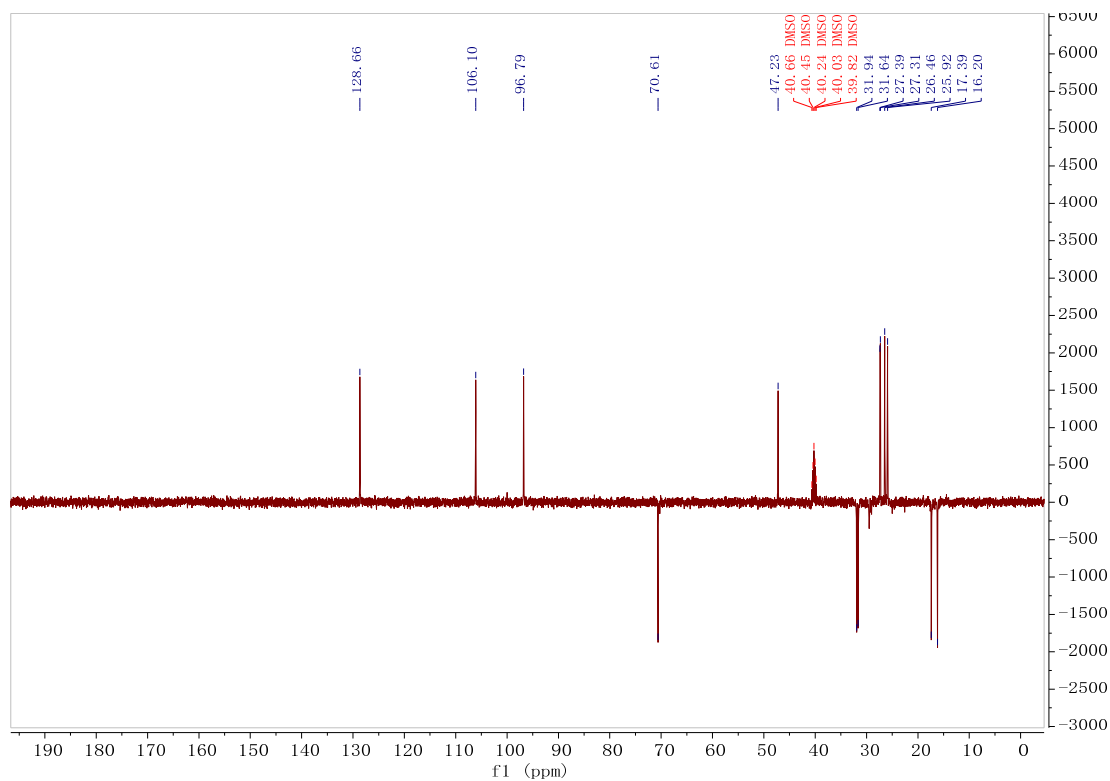

**Figure S14. DEPT 135 spectrum of compound 2 in DMSO- $d$**

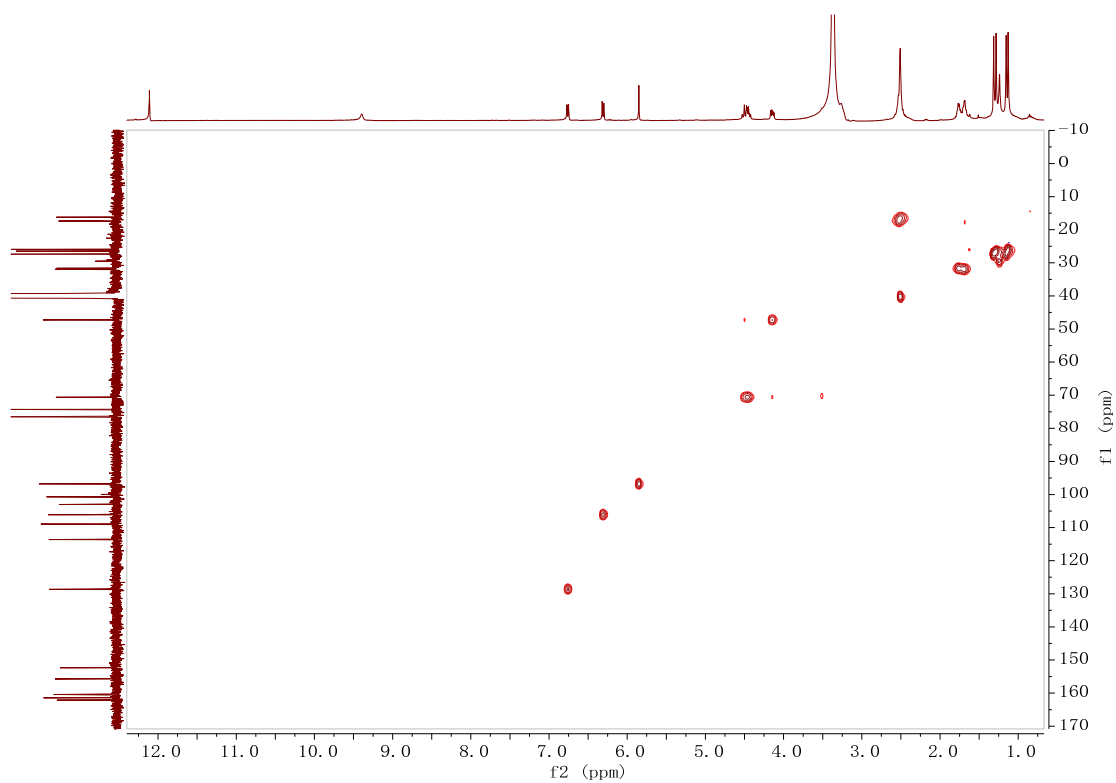

**Figure S15.** HSQC spectrum of compound **2** in DMSO-*d*<sub>6</sub>

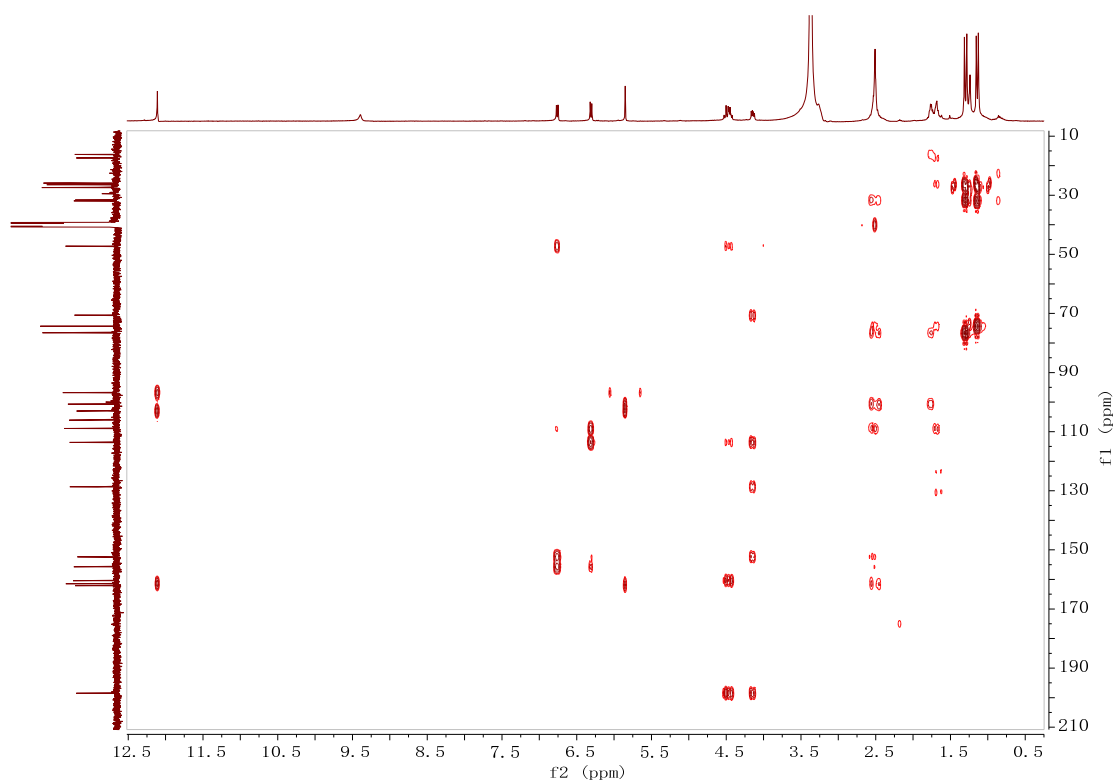

**Figure S16.** HMBC spectrum of compound **2** in DMSO-*d*<sub>6</sub>



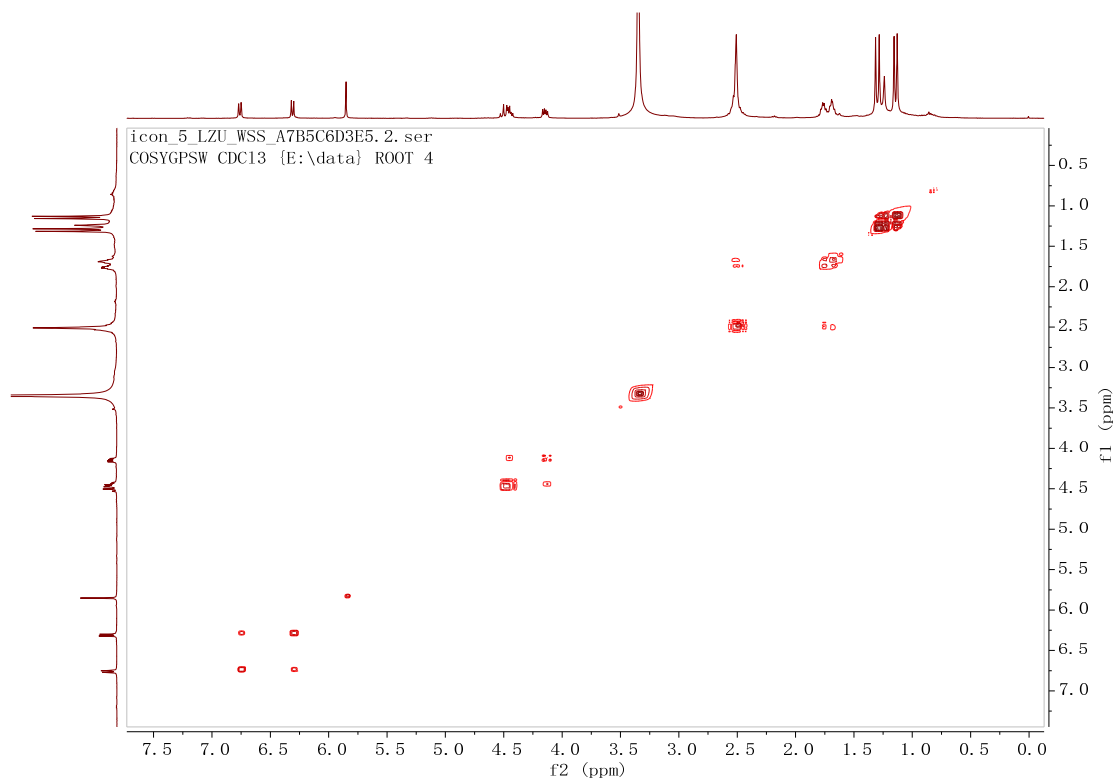

**Figure S17.**  $^1\text{H}$ - $^1\text{H}$  COSY spectrum of compound **2** in  $\text{DMSO}-d_6$

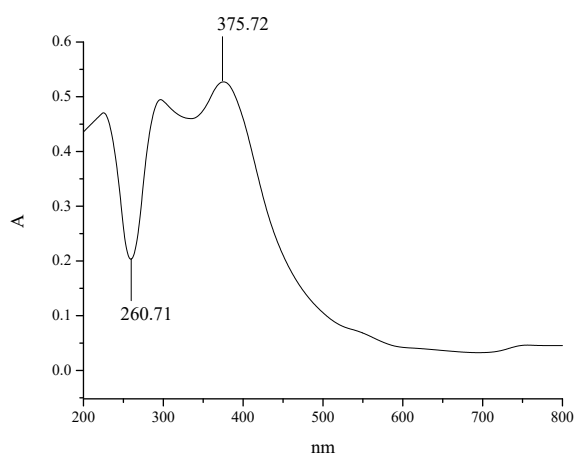

**Figure S18.** UV spectrum of compound **3**

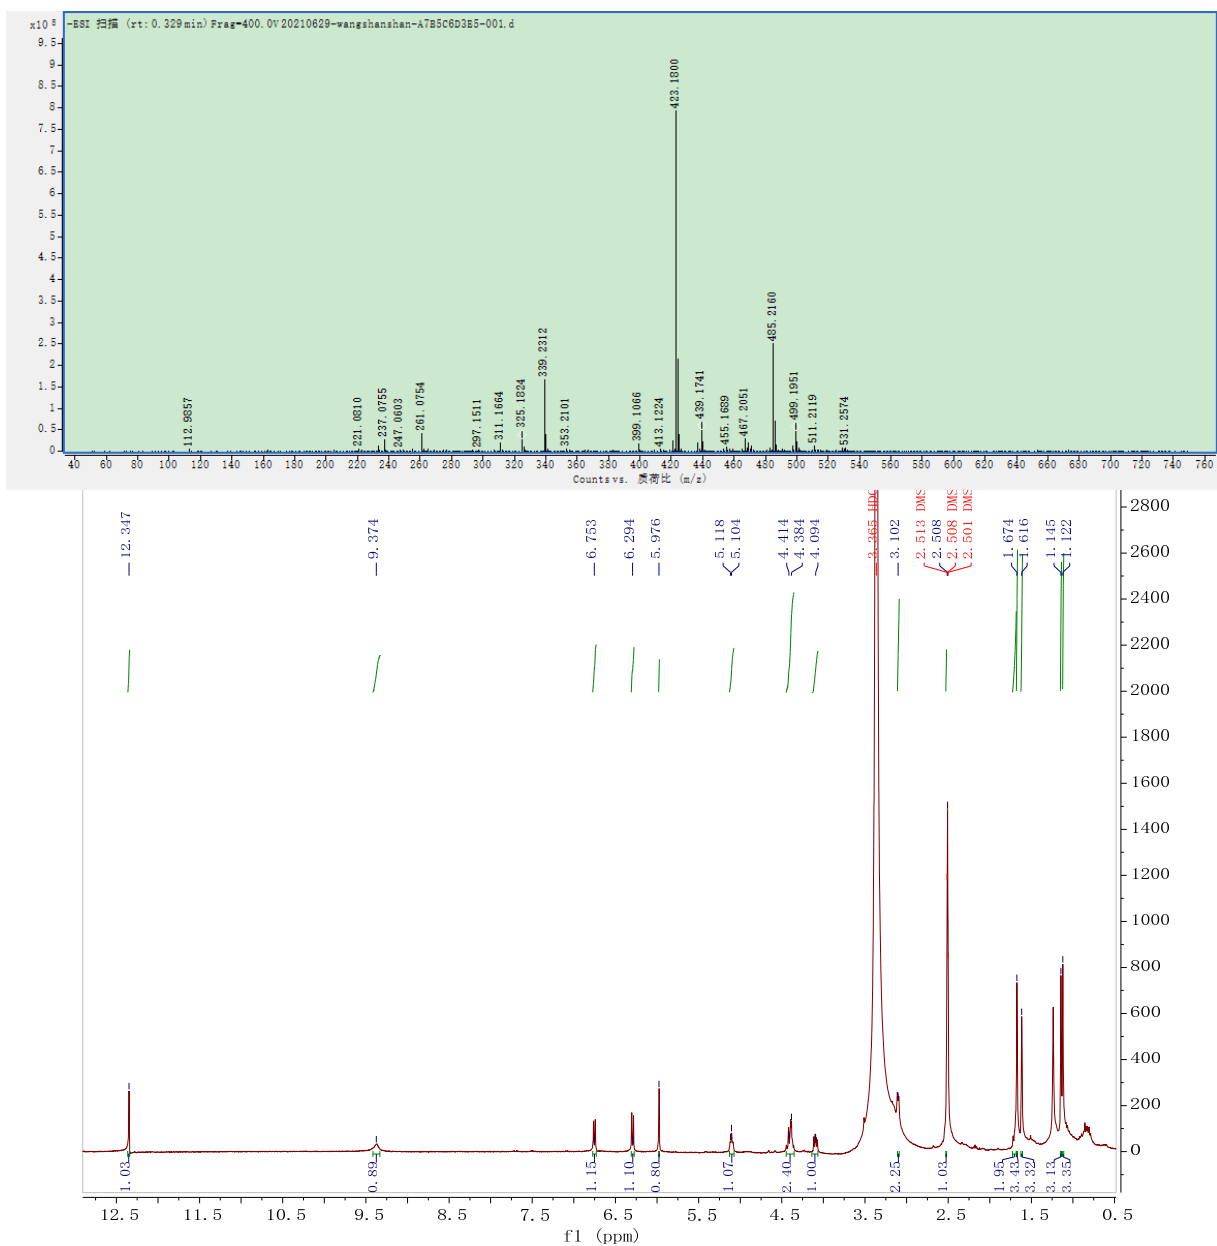

**Figure S20.** <sup>1</sup>H NMR spectrum of compound **3** in DMSO-*d*<sub>6</sub> (400 MHz)

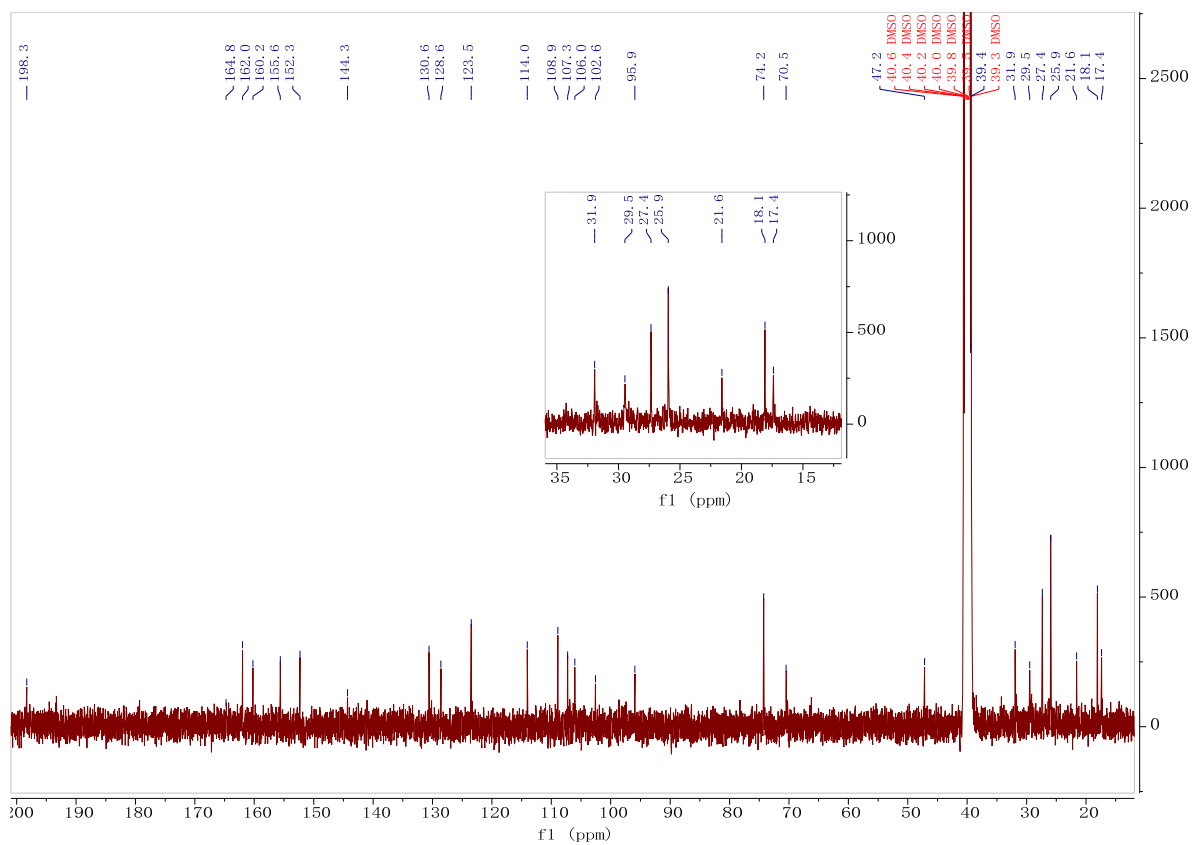

**Figure S21.  $^{13}\text{C}$  NMR spectrum of compound 3 in  $\text{DMSO}-d_6$  (100 MHz)**

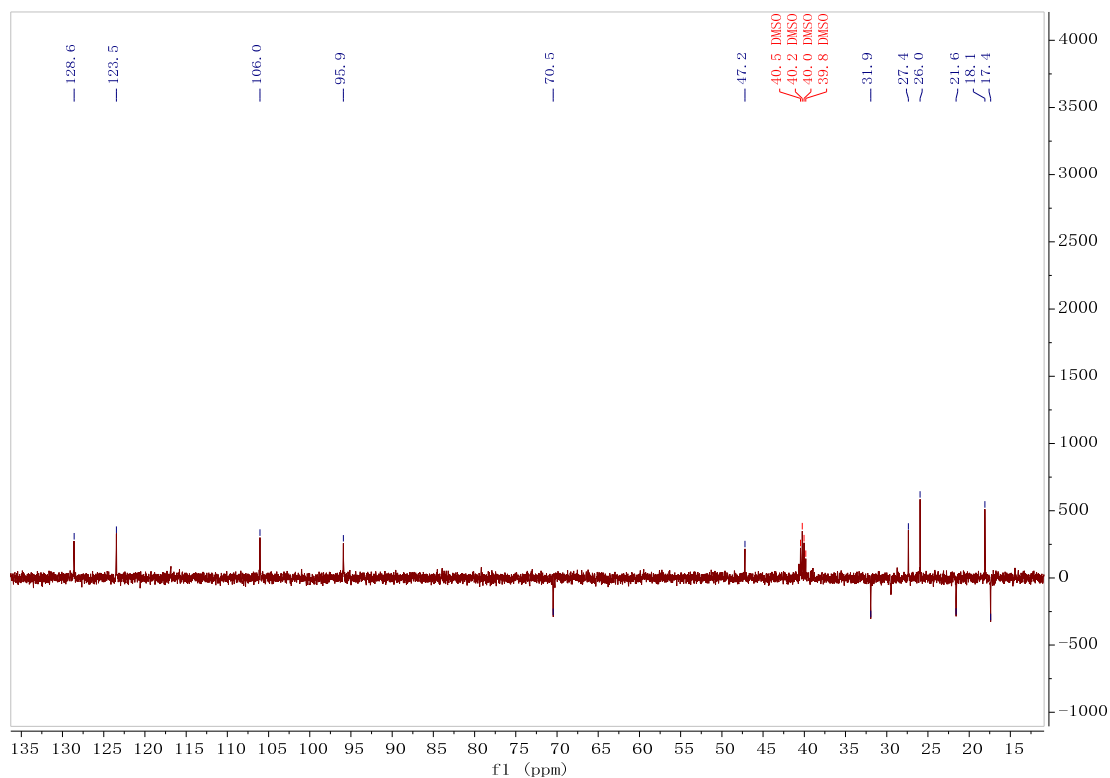

**Figure S22. DEPT 135 spectrum of compound 3 in  $\text{DMSO}-d_6$**

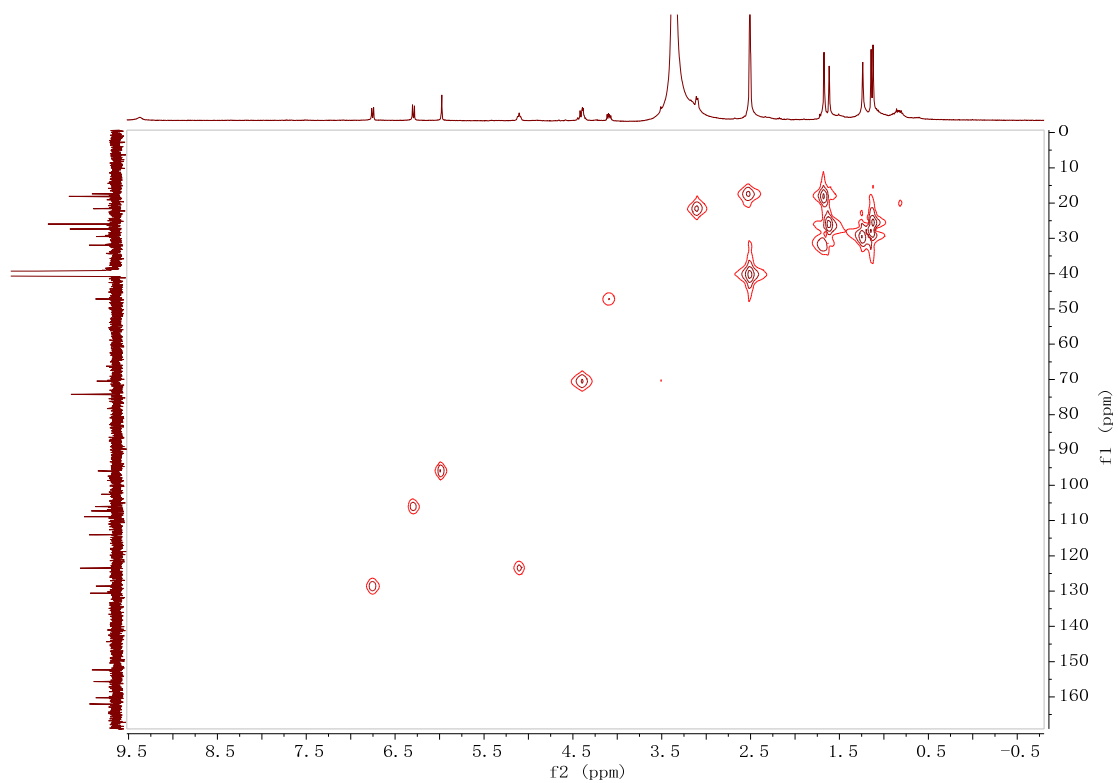

**Figure S23.** HSQC spectrum of compound **3** in DMSO-*d*<sub>6</sub>

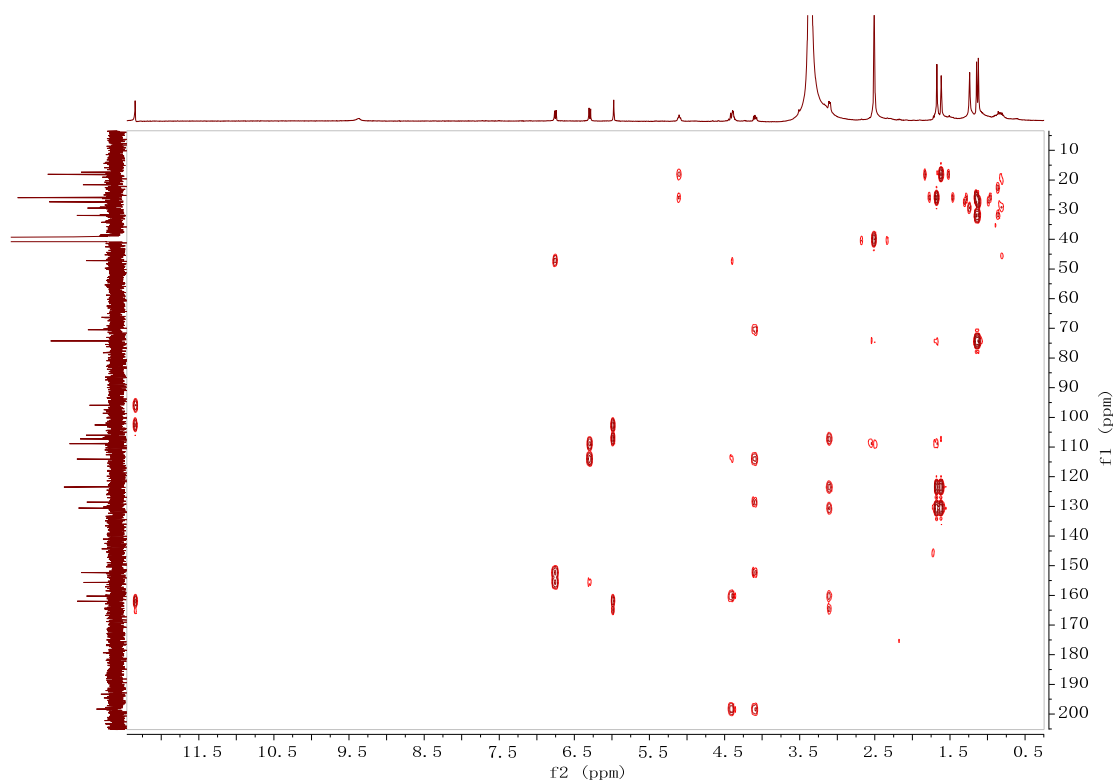

**Figure S24.** HMBC spectrum of compound **3** in DMSO-*d*<sub>6</sub>

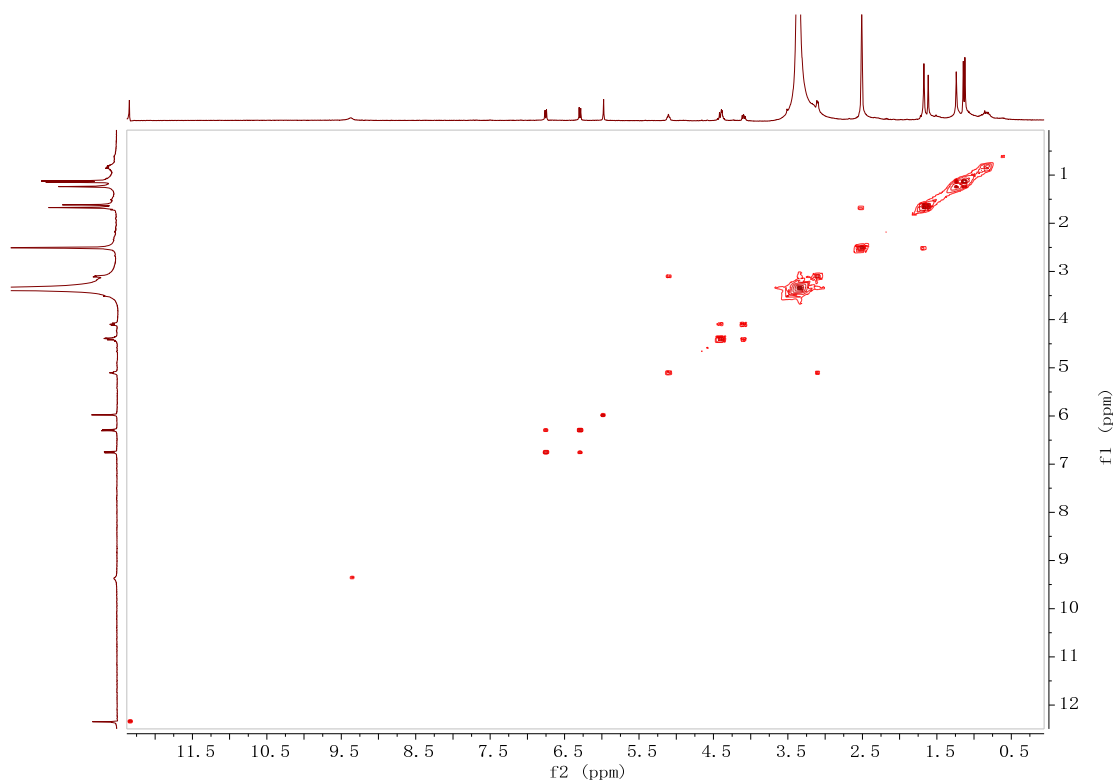

**Figure S25.**  $^1\text{H}$ - $^1\text{H}$  COSY spectrum of compound **3** in  $\text{DMSO-}d_6$

**Table S1.** Rf value and UV lambda Max of Compounds **4-21**.

|           | $\text{CHCl}_3$ : MeOH(15:1)<br>Rf | $\text{CH}_2\text{Cl}_2$ : MeOH(20:1)<br>Rf | Petroleum ether: acetone<br>(7.5:2.5) Rf | Wavelength (nm) |
|-----------|------------------------------------|---------------------------------------------|------------------------------------------|-----------------|
| <b>4</b>  | 0.67                               | 0.51                                        | 0.68                                     | 233, 324        |
| <b>5</b>  | 0.49                               | 0.34                                        | 0.23                                     | 231, 276, 373   |
| <b>6</b>  | 0.34                               | 0.25                                        | 0.62                                     | 226 ,228 ,351   |
| <b>7</b>  | 0.71                               | 0.54                                        | 0.45                                     | 271             |
| <b>8</b>  | 0.49                               | 0.31                                        | 0.31                                     | 268             |
| <b>9</b>  | 0.23                               | 0.22                                        | 0.51                                     | 208, 264        |
| <b>10</b> | 0.40                               | 0.25                                        | 0.22                                     | 209, 265        |
| <b>11</b> | 0.43                               | 0.23                                        | 0.20                                     | 208 ,267        |
| <b>12</b> | 0.60                               | 0.37                                        | 0.34                                     | 121 ,269        |
| <b>13</b> | 0.91                               | 0.80                                        | 0.54                                     | 220 ,267        |
| <b>14</b> | 0.68                               | 0.46                                        | 0.45                                     | 218 ,260        |
| <b>15</b> | 0.80                               | 0.28                                        | 0.25                                     | 212, 261        |
| <b>16</b> | 0.60                               | 0.37                                        | 0.28                                     | 210, 262        |
| <b>17</b> | 0.65                               | 0.45                                        | 0.37                                     | 206, 295        |
| <b>18</b> | 0.45                               | 0.29                                        | 0.20                                     | 233, 279, 369   |
| <b>19</b> | 0.66                               | 0.40                                        | 0.31                                     | 222, 289        |
| <b>20</b> | 0.69                               | 0.48                                        | 0.34                                     | 217 ,279 ,318   |
| <b>21</b> | 0.80                               | 0.57                                        | 0.40                                     | 229, 299        |
